# Supplementary material
Source: PubMed Central journal article supplement (PMC4724534)
Supplement: NIHMS743088-supplement-1.pdf [file NIHMS743088-supplement-1.pdf]

**Supplementary Table I.** Antibodies used for immunophenotyping

| <b>Antibody</b>                            | <b>Fluorochrome</b> | <b>Clone</b> | <b>Catalog #</b> | <b>Company</b> |
|--------------------------------------------|---------------------|--------------|------------------|----------------|
| CD3 $\epsilon$                             | APC-Cy7 or PE-Cy5   | 145-2C11     | 557596/553065    | BD Biosciences |
| CD4                                        | APC or AF 700       | RM4-5        | 553051/561025    | BD Biosciences |
| CD8                                        | PE-CF594 or PE-Cy5  | 53-6.7       | 562283/561094    | BD Biosciences |
| CD25                                       | PE-Cy7              | PC61         | 552880           | BD Biosciences |
| CD154/CD40L                                | APC                 | MR1          | 17-1541-82       | eBioscience    |
| CD279/PD-1                                 | FITC                | J43          | 11-9985-85       | eBioscience    |
| CD69                                       | PE-CF594            | H1.2F3       | 562455           | BD Biosciences |
| CD152/CTLA-4                               | PE                  | UC10-4F10-11 | 561718           | BD Biosciences |
| CD11b                                      | PE-CF594            | M1/70        | 562287           | BD Biosciences |
| Ly6G                                       | APC                 | 1A8          | 560599           | BD Biosciences |
| F4/80                                      | APC-eFluor 780      | BM8          | 47-4801-82       | eBioscience    |
| iNOS                                       | PE                  | CXNFT        | 12-5920-82       | eBioscience    |
| IL4                                        | PE-Cy7              | 11B11        | 560699           | BD Biosciences |
| IFN $\gamma$                               | V450                | XMG1.2       | 560661           | BD Biosciences |
| CD49b/DX5                                  | APC                 | DX5          | 560628           | BD Biosciences |
| NK1.1                                      | AF 700              | PK136        | 560515           | BD Biosciences |
| TCR- $\beta$                               | PerCP-Cy 5.5        | H57-597      | 560657           | BD Biosciences |
| CD44                                       | APC-Cy7             | IM7          | 560568           | BD Biosciences |
| CD11c                                      | AF488               | N418         | 53-0114-82       | eBioscience    |
| DEC205                                     | PerCP-eFluor 710    | 205yekta     | 46-2051-82       | eBioscience    |
| IL-10                                      | AF700               | JES5-16E3    | 56-7101-82       | eBioscience    |
| CD16/CD32                                  | N/A                 | 2.4G2        | 553142           | BD Biosciences |
| CD1d Tetramer loaded with $\alpha$ -Galcer | PE                  | N/A          | N/A              | NIH            |

**Supplementary Table II.** Primers used for individual RT-PCRs

| <b>Gene Name</b>                          | <b>Gene Symbol</b> | <b>Assay ID</b> | <b>Company</b>                |
|-------------------------------------------|--------------------|-----------------|-------------------------------|
| $\beta$ -actin                            | <i>Actb</i>        | Mm00607939_s1   | Invitrogen/Applied Biosystems |
| Chemokine (C-C motif) ligand 1            | <i>Ccl1</i>        | Mm00441236_m1   | Invitrogen/Applied Biosystems |
| Chemokine (C-C motif) ligand 12           | <i>Ccl12</i>       | Mm01617100_m1   | Invitrogen/Applied Biosystems |
| Chemokine (C-C motif) ligand 2            | <i>Ccl2</i>        | Mm00441242_m1   | Invitrogen/Applied Biosystems |
| Fatty acid binding protein 4              | <i>Fabp4</i>       | Mm00445878_m1   | Invitrogen/Applied Biosystems |
| Long-chain fatty acid transport protein 4 | <i>Fatp4</i>       | Mm01327405_m1   | Invitrogen/Applied Biosystems |
| Tumor necrosis factor $\alpha$            | <i>Tnf</i>         | Mm00443258_m1   | Invitrogen/Applied Biosystems |

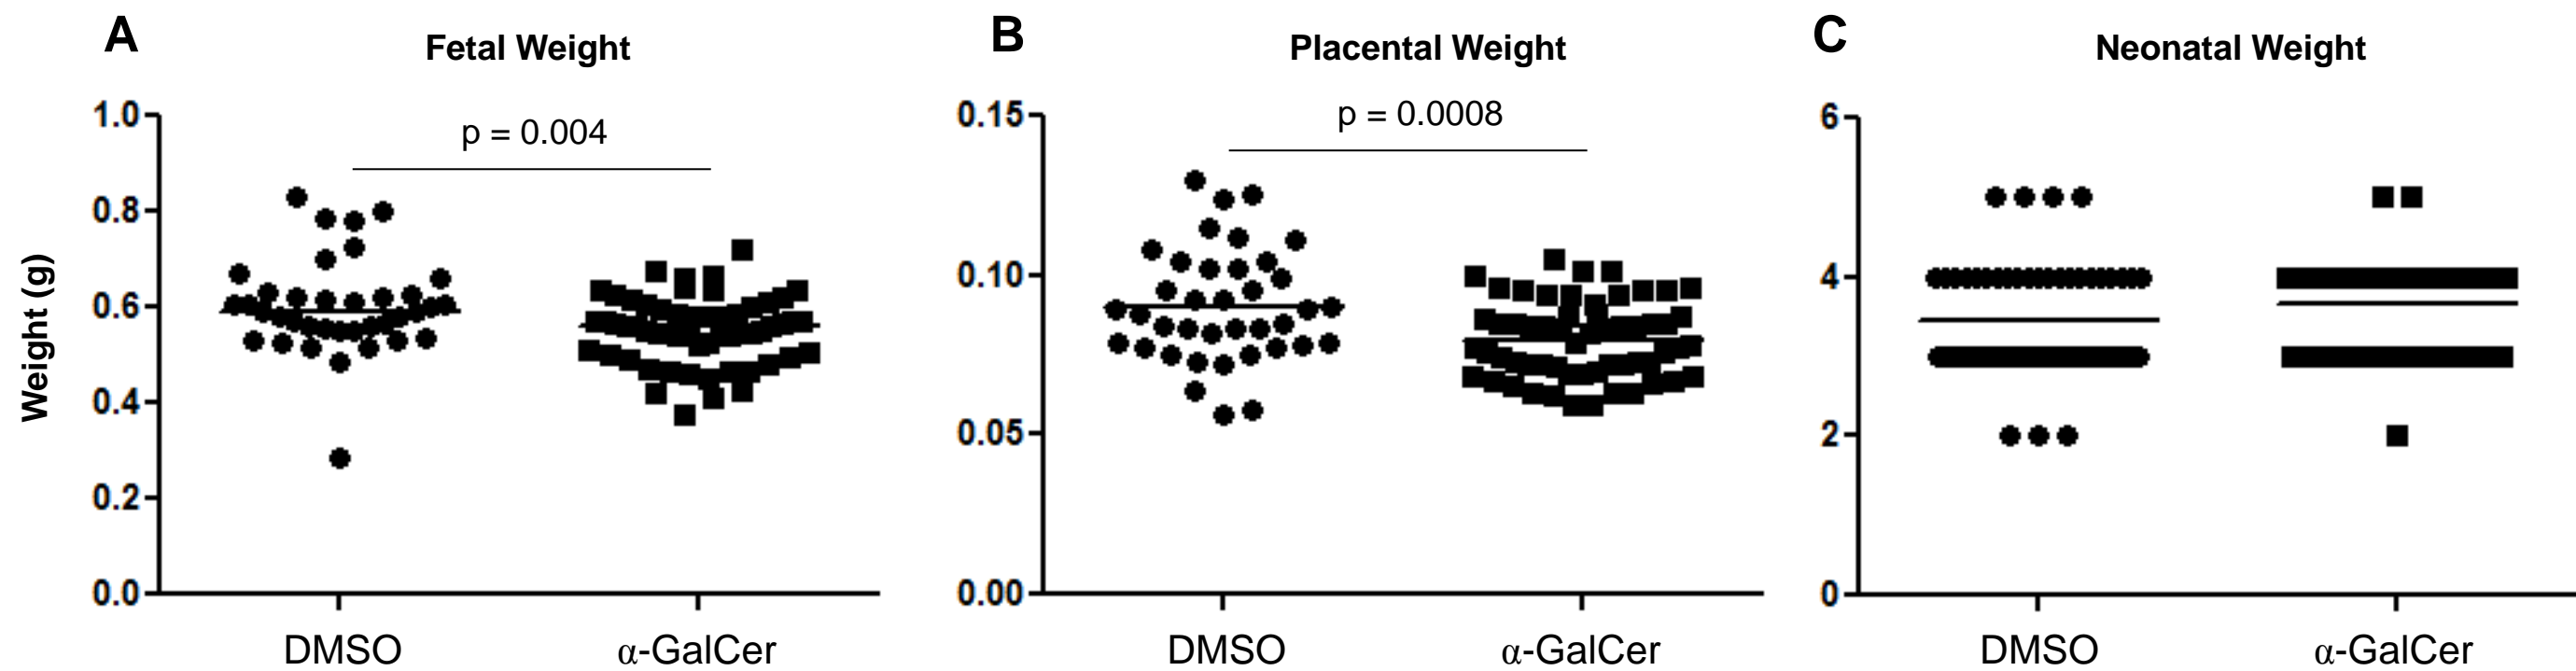

**Supplementary Figure 1. Fetal, placental, and neonatal weights.** (A&B) Fetuses and placentae from dams i.v. injected with 2 $\mu$ g of  $\alpha$ -GalCer or DMSO were weighed 6 h post-injection. Data are pooled from 6-8 litters (n=38 for DMSO and n=58 for  $\alpha$ -GalCer). (C) Neonates delivered by dams i.v. injected with 2 $\mu$ g of  $\alpha$ -GalCer or DMSO were weighed at 1 week postpartum. Data are from independent neonates (n=57 for DMSO and n=46 for  $\alpha$ -GalCer).

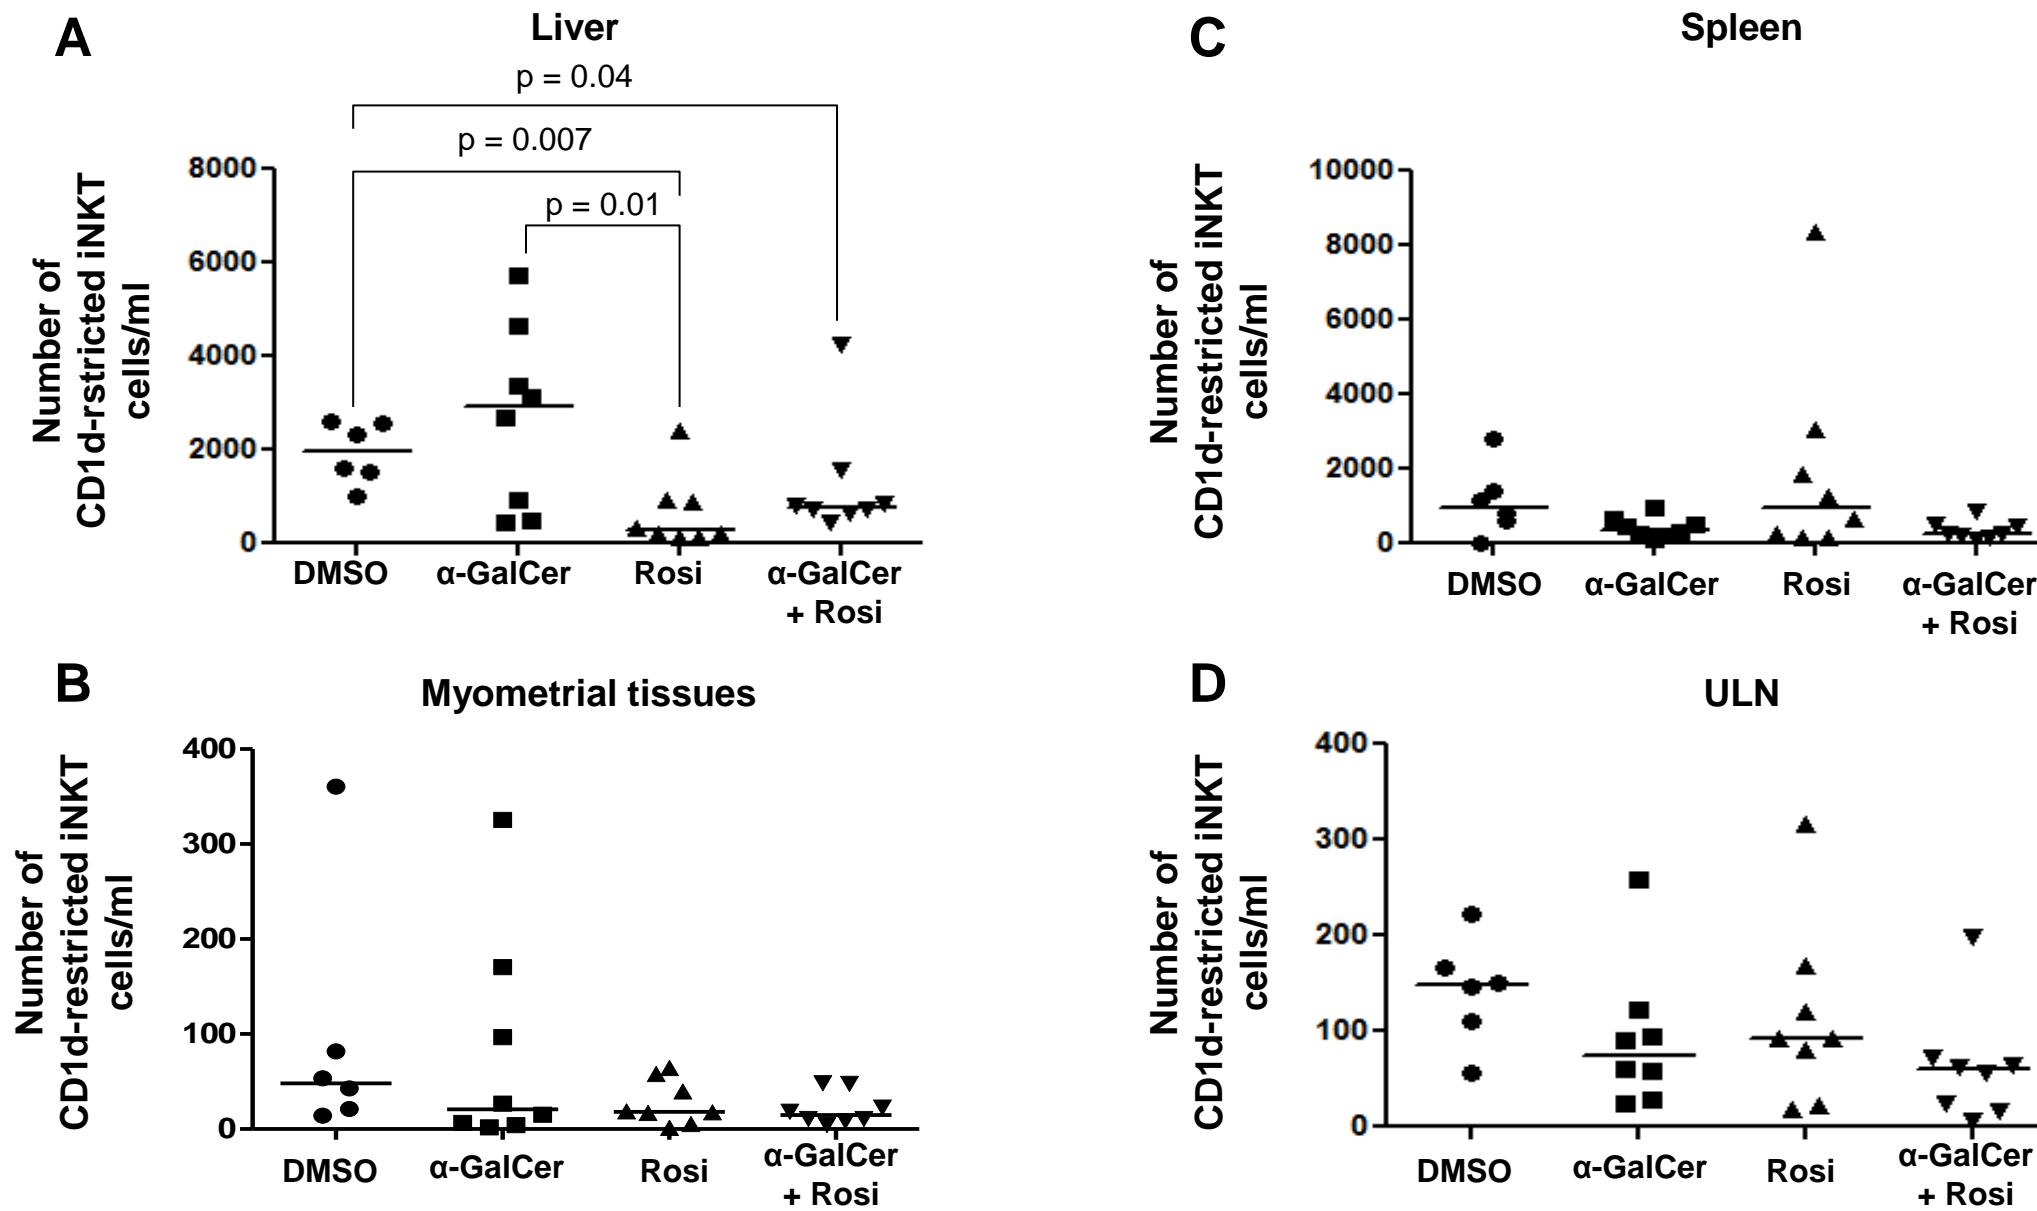

**Supplementary Figure 2. CD1d-restricted iNKT cells in the liver, myometrium, spleen, and lymph nodes.** Number of CD1d-restricted iNKT cells in the liver (A), myometrium (B), Spleen (C), and uterine lymph nodes (D) from mice injected with DMSO, α-GalCer, rosiglitazone (Rosi), or α-GalCer + rosiglitazone. Data are representative of individual dams, n=6-8 each.

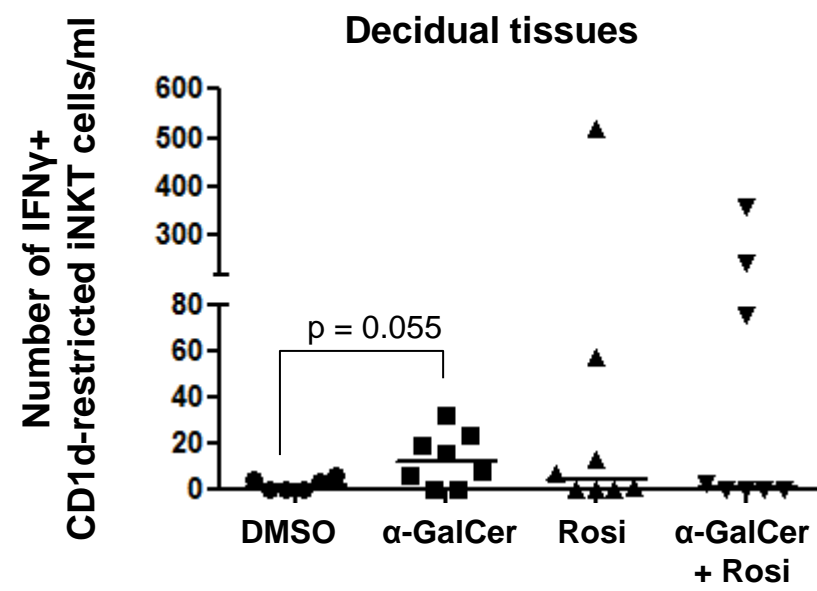

**Supplementary Figure 3. IFN $\gamma$ + CD1d-restricted iNKT cells in decidual tissues.** Number of IFN $\gamma$ + CD1d-restricted iNKT cells in decidual tissues from mice injected with DMSO,  $\alpha$ -GalCer, rosiglitazone (Rosi), or  $\alpha$ -GalCer + rosiglitazone. Data are from individual dams, n=6-8 each.

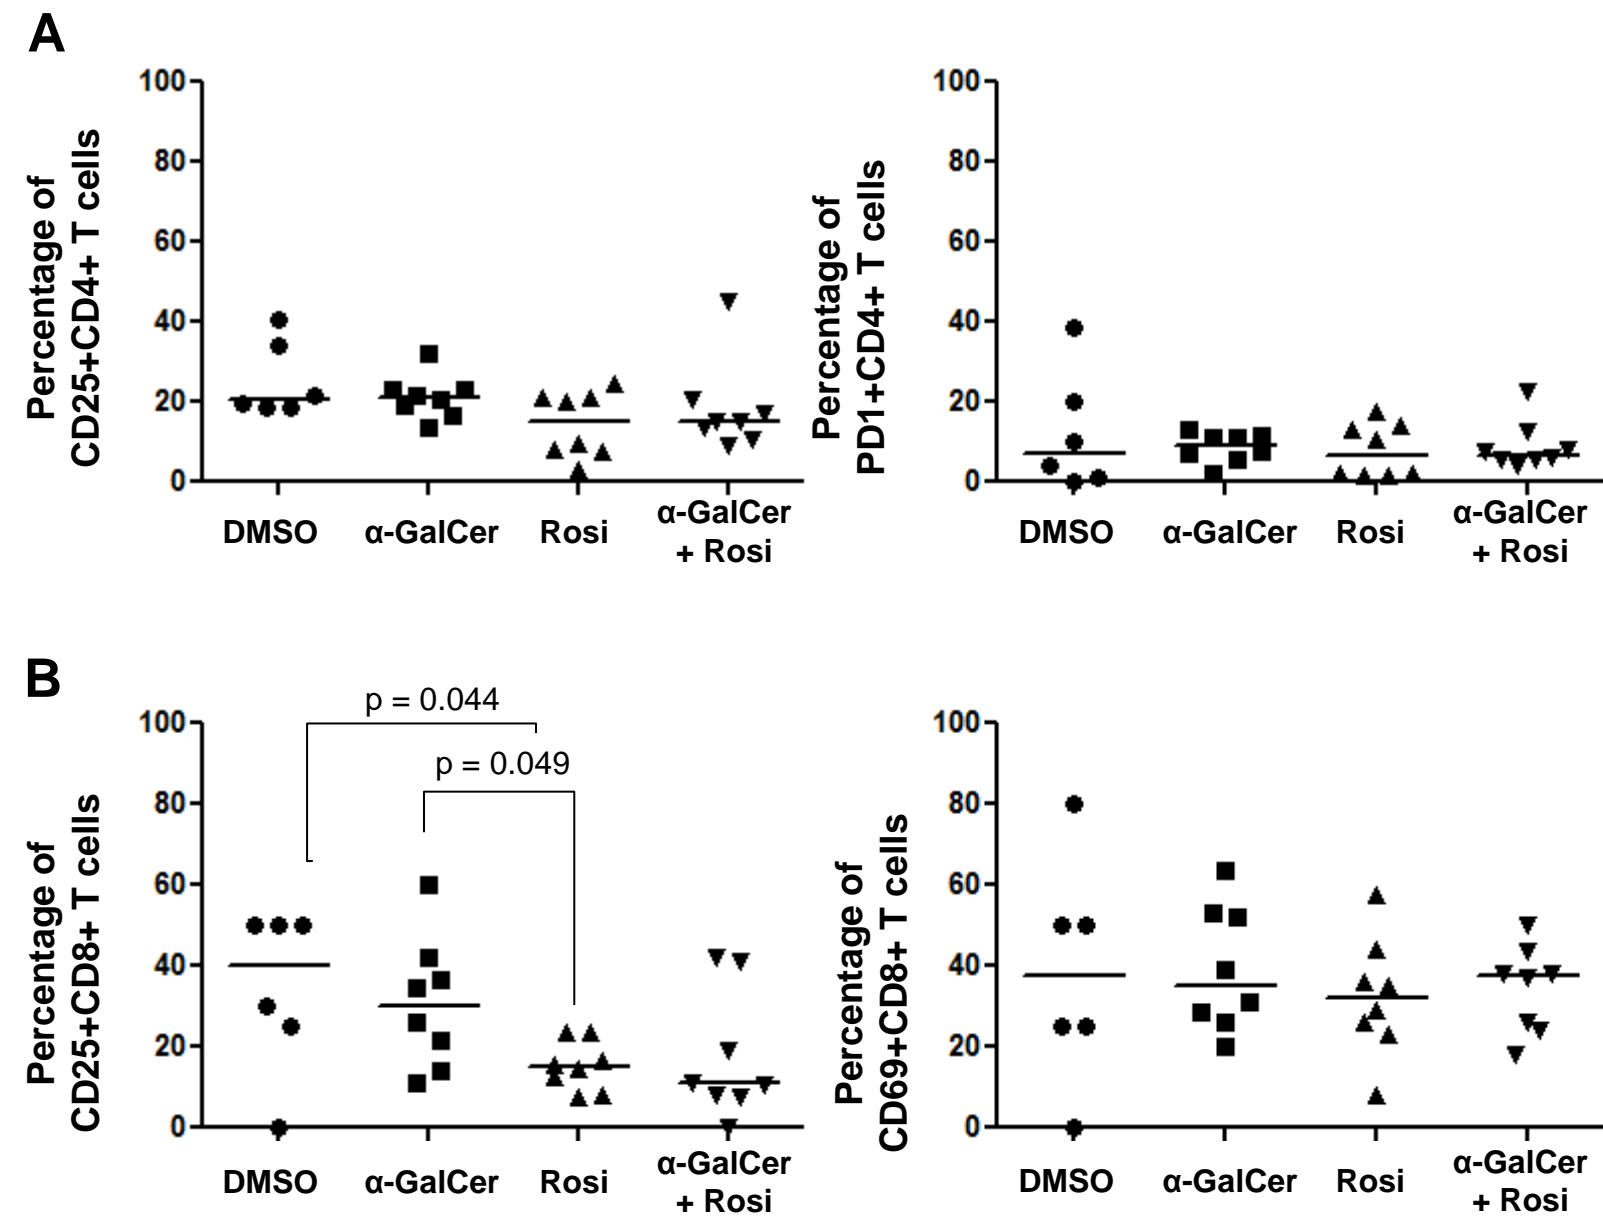

**Supplementary Figure 4. Activated CD4+ and CD8+ T cells in decidual tissues.** (A) Proportion of CD25+CD4+ T cells and PD1+CD4+ T cells in decidual tissues from mice injected with DMSO,  $\alpha$ -GalCer, rosiglitazone (Rosi), or  $\alpha$ -GalCer + rosiglitazone. (B) Proportion of CD25+CD8+ T cells and CD69+CD8+ T cells in decidual tissues from mice injected with DMSO,  $\alpha$ -GalCer, rosiglitazone, or  $\alpha$ -GalCer + rosiglitazone. Data are from individual dams, n=6-8 each.

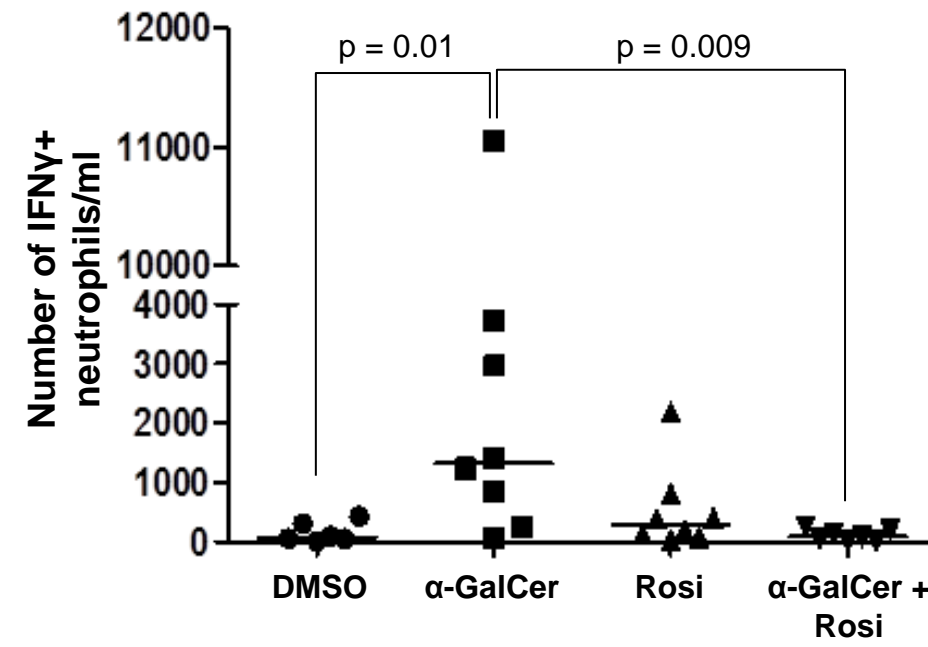

**Supplementary Figure 5.** Number of IFN $\gamma$ + neutrophils in myometrial tissues from mice injected with DMSO,  $\alpha$ -GalCer, rosiglitazone (Rosi), or  $\alpha$ -GalCer + rosiglitazone. Data are from individual dams, n=6-8 each.

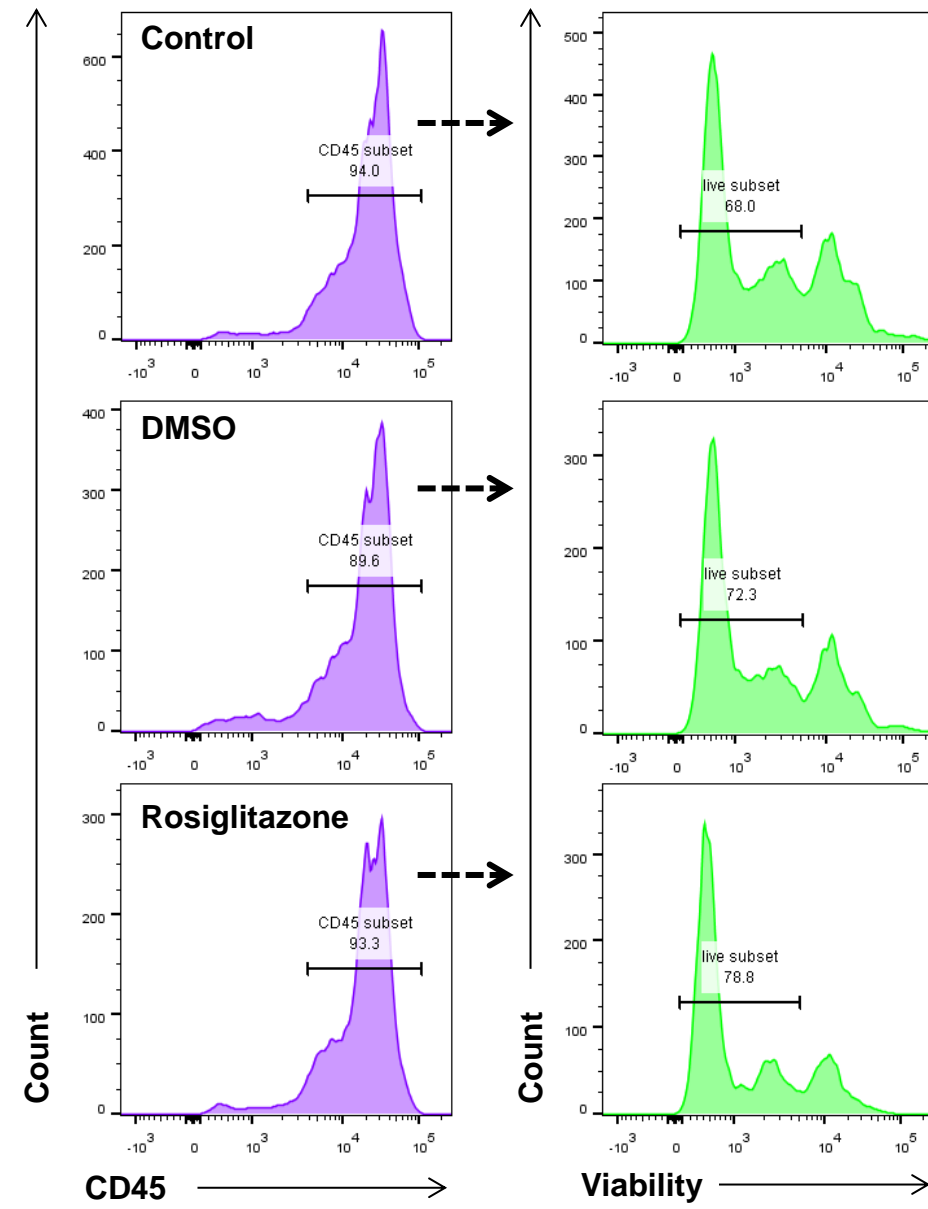

**Supplementary Figure 6.** Viability of decidual cells after treatment with rosiglitazone. Cell viability of decidual leukocytes (CD45+ cells) was determined by flow cytometry after 6 hrs of incubation with DMSO (rosiglitazone vehicle), rosiglitazone, or without either treatment (control).
